# Supplementary material for: The Energy Status of Astrocytes Is the Achilles’ Heel of eIF2B-Leukodystrophy
Source: MDPI journal article supplement (doi:10.3390/cells10081858), 2021-07-22

## Supplementary Figures

**Figure S1**

### **Purity of primary astrocytes cultures**

Left panel: representative analysis of a sample of cells following their isolation from the brains of newborn mice. Cells stained with APC-conjugated ACSA1 antibodies. Gray, unstained control. Shown are ACSA1-positive WT (blue) and Mut (orange) primary astrocytes (~94% of the isolated cells in the sample).

Right panel: representative image of the primary astrocytes culture, stained with DAPI (blue) and antibodies specific for GFAP (green). Scale bar, 10  $\mu\text{m}$ .

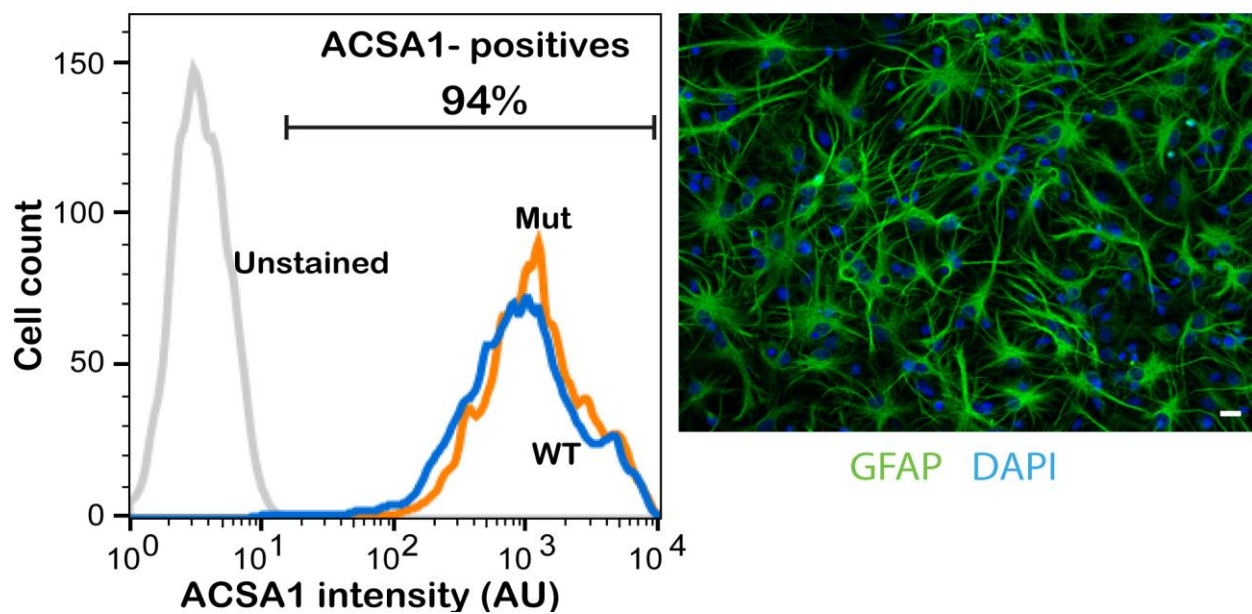

**Figure S2**

**Mut astrocytes exhibit higher MitoTracker Deep Red staining**

WT (blue) and Mut (orange) primary astrocytes were incubated for 48 hr in DMEM-HG medium followed by MitoTracker® Deep Red FM staining and flow cytometry analysis. Left panel: shown is a representative experiment. Gray and black lines, unstained controls.

Right panel: Bars represent values of mean MitoTracker intensity  $\pm$  SEM of 3 independent experiments, relative to WT. \* $p < 0.03$ ; Student's t-test.

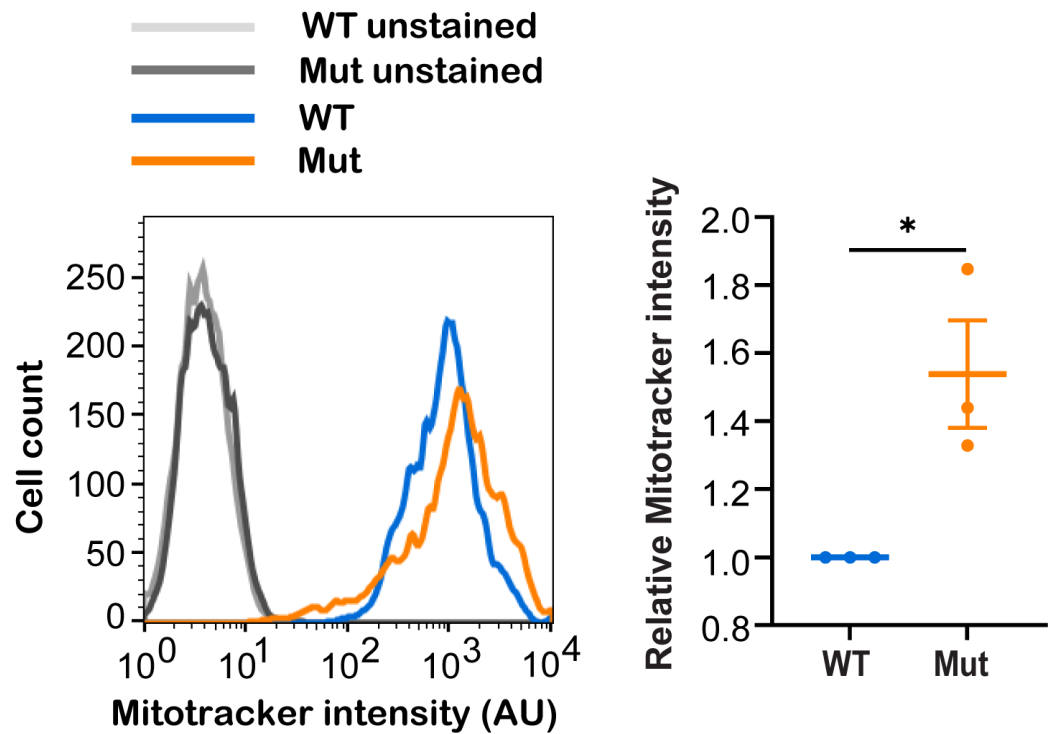

### Figure S3

#### PGC1 $\alpha$ subcellular localization (supplementary to Figure 2B)

Shown are representative images of Mut primary astrocytes cultured in DMEM-HG medium (left) or following incubation with DMEM-GS medium for 4 hr (right). The cells were stained with Hoechst (dark blue) and PGC1 $\alpha$  antibodies (green). Scale bar, 10  $\mu$ m. Merged images are shown. Note that glucose starvation increases nuclear localization of PGC1 $\alpha$  (as indicated by nuclear light blue color upon decrease of the cytoplasmic PGC1 $\alpha$  green signal).

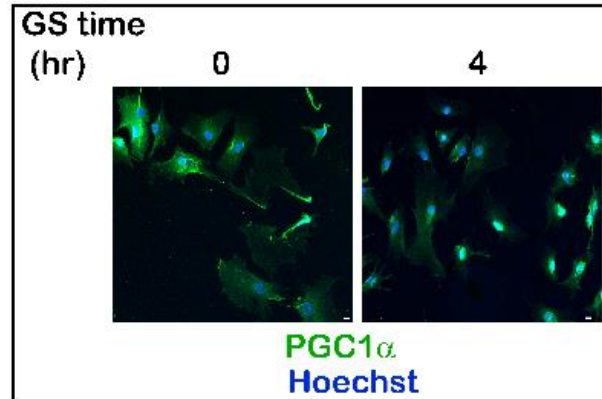

**Figure S4**

**GS effect on FTH1 protein level.**

Immunoblot analyses of FTH1 protein level in WT (blue) and Mut (orange) primary astrocytes incubated for 48 hr in DMEM-HG or DMEM-GS medium. A representative blot is shown. Bars represent average  $\pm$  SEM of FTH1 per actin ratio  $\pm$  SEM of  $\geq 3$  repetitions, normalized to WT-HG. \*\*\* $p < 0.001$ ; \*\*\*\* $p < 0.0001$  Student's t-test.

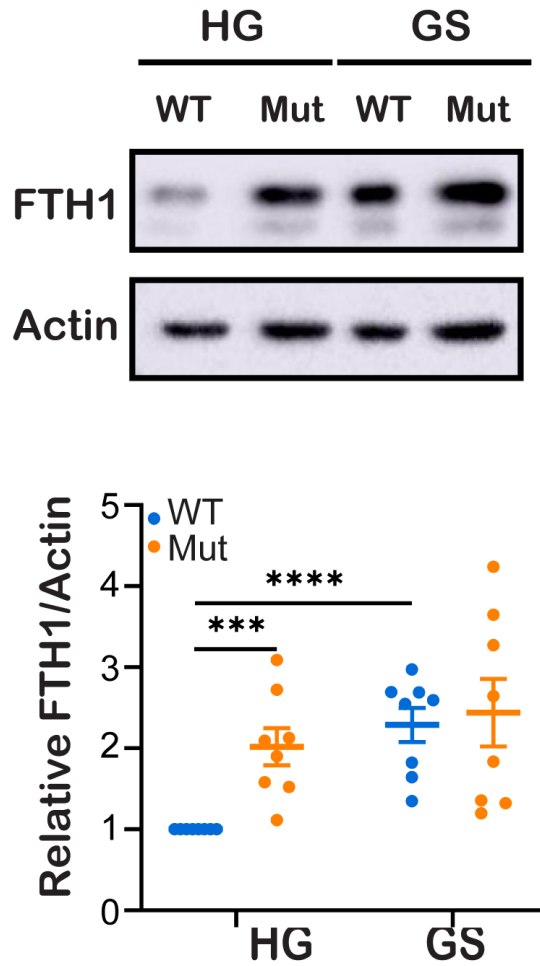

Supplement: s1 [file s1]
